# Supplementary material
Source: PubMed Central journal article supplement (PMC6727263)

## Supplemental Figures Table of Contents

Supplemental Figure 1: Proteinuria in *Ebf1<sup>fl/fl</sup>*, Podo+ mice

Supplemental Figure 2: mT/mG reporter and the *Foxd1* lineage in kidney and adipose

**Supplemental Figure 1: Proteinuria in *Ebf1<sup>fl/fl</sup>,Podo+* mice** (A) Urine from 6-month-old *Ebf1<sup>fl/fl</sup>,Podo+* mice had total protein measured. (B) Coomassie staining was performed on PAGE-separated urine from 3month old *Ebf1<sup>fl/fl</sup>,Podo+* mice and controls. BSA is used as a loading control. \*Indicates  $p \leq 0.05$  by ANOVA.

Supplemental Figure 1

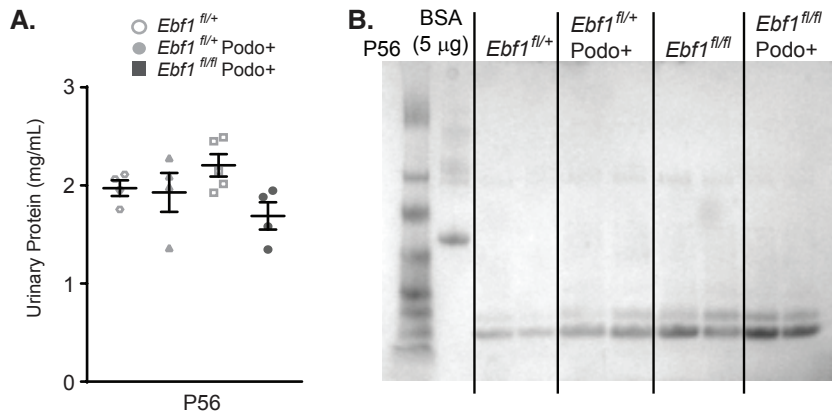

**Supplemental Figure 2: mT/mG reporter and the Foxd1 lineage in kidney and adipose (A)**

A schematic representation of how the mT/mG reporter mice excise the presence of membrane-targeted tdTomato plus a stop sequence when cre recombinase is expressed, and instead begin to express a membrane-targeted GFP. (B) A thick section of kidney from an mT/mG mouse mated onto the Foxd1-cre line. All the stromal descendants of the Foxd1-lineage appear in green including the glomerular mesangium, extraglomerular mesangium and juxtaglomerular cells, interstitial pericytes, and other mural cells of the kidney. (C) Control kidney with mT/mG transgene, but no cre expression. (D) No recombination from the Foxd1-cre driver is present in adipose. Both brown adipose (BAT) from the subscapular region and white adipose from the inguinal hip (IWAT) and epididymal (EWAT) depots were examined. (E) Unlike the global *Ebf1*-KO, no lipodystrophy is present in the *Ebf1*<sup>fl/fl</sup>, Foxd1+ mice. \*Indicates  $p \leq 0.05$ .

Supplemental Figure 2

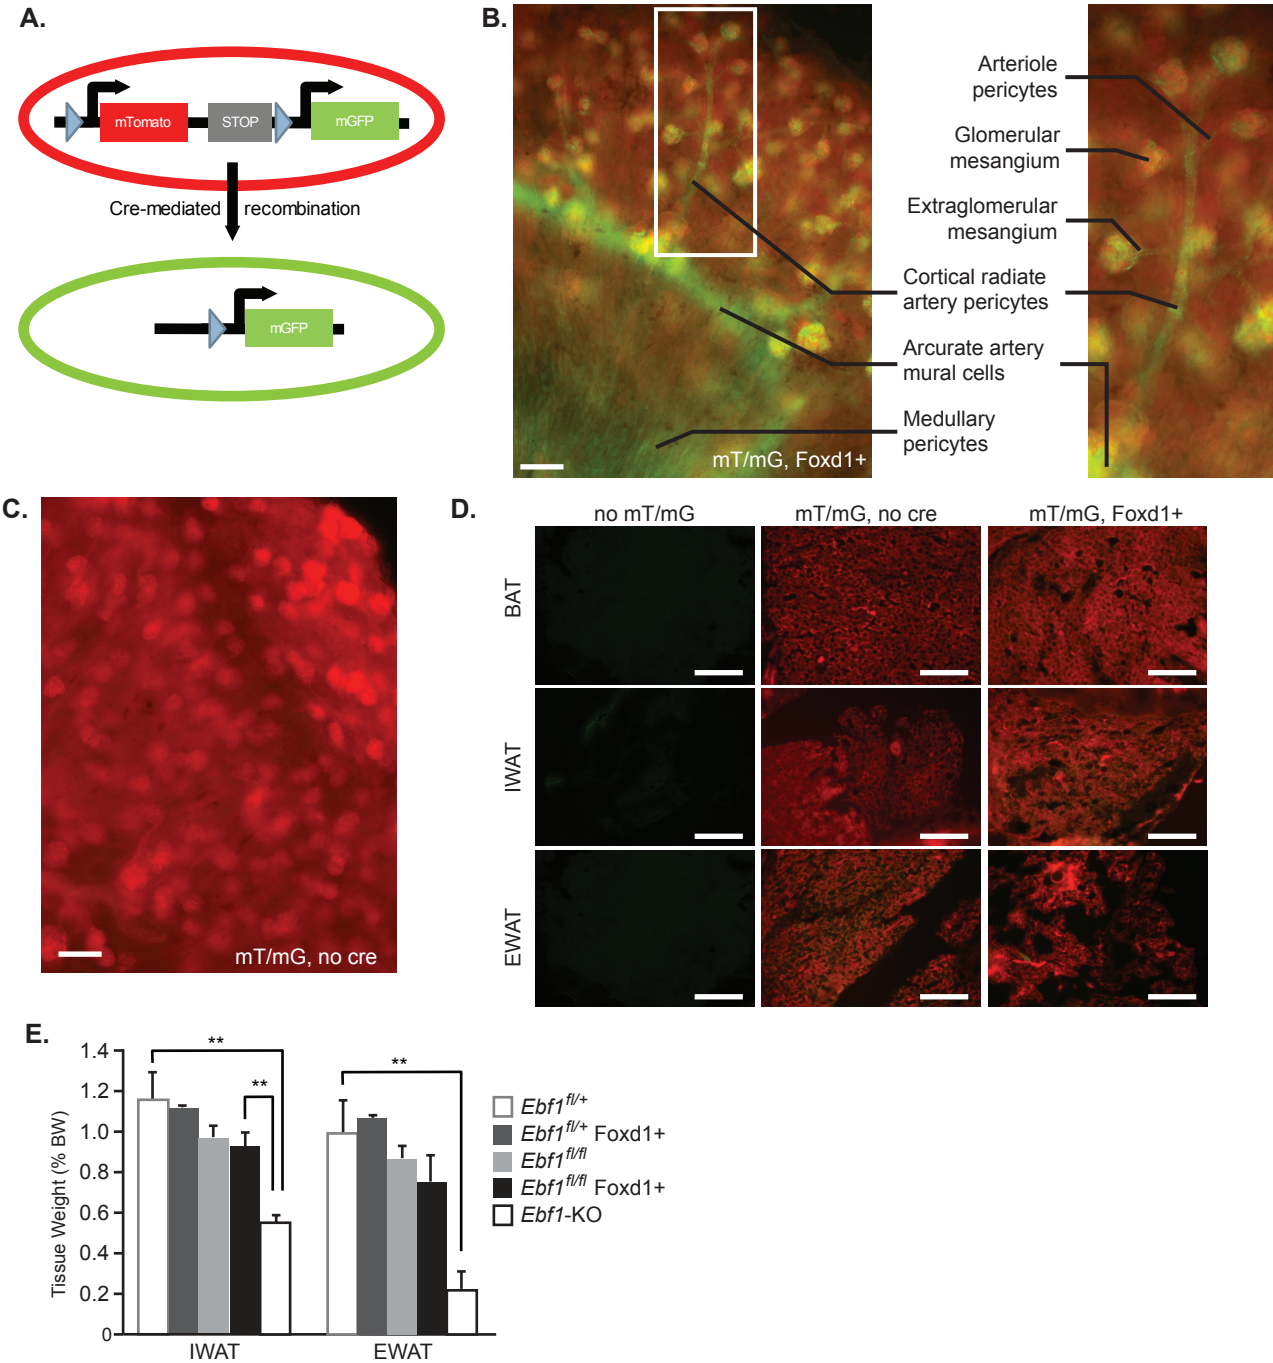

Supplement: ASN.2018070699SupplementaryData.pdf [file ASN.2018070699SupplementaryData.pdf]
